# Supplementary material
Source: Springer Nature journal article supplement (https://www.springermedizin.de/resource/supplementary/12888_2012_1217_MOESM4_ESM.doc/9480716)
Supplement: MOESM4 [file 9480716]

Table 7: Distribution of lifetime cannabis use

| **VARIABLE (N)** | **PREVALENCE %** | **X2** | **P VALUE** |
| --- | --- | --- | --- |
| **GENDER**  Male (271)  Female (124) | 23.6  15.3 | 3.526 | 0.060 |
| **RESIDENCE**  Rural (183)  Urban (212) | 12.0  28.8 | 16.606 | 0.000* |
| **MARITAL STATUS**  Married (234)  Unmarried (161) | 15.8  28.6 | 9.356 | 0.002* |
| **EMPLOYED**  Yes (211)  No (184) | 18.5  23.9 | 1.746 | 0.186 |
| **STUDENT**  Yes (42)  No (353) | 47.6  17.8 | 20.045 | 0.000* |
| **INCOME**  Yes (289)  No (106) | 17.6  30.2 | 7.35 | 0.007* |

*Statistically significant
